# Supplementary material
Source: publisher figshare collection journal article supplement (https://karger.figshare.com/ndownloader/files/36448437)
Supplement: Supplementary file 1 [file 36448437]

**Supplementary File 1: Search Strategy for different Databases**

**PubMed = 504**

(("nocardia infections"[MeSH Terms] OR nocardia infection[Text Word]) AND ("cerebrum"[MeSH Terms] OR "brain"[MeSH Terms] OR cerebral[Text Word])) OR CNS[All Fields] OR (intracranial[All Fields] AND ("meningitis"[MeSH Terms] OR meningitis[Text Word])) AND ("brain abscess"[MeSH Terms] AND brain abscess [Text Word]) OR “spine” "[MeSH Terms] OR “spinal” "[MeSH Terms] OR “subdural” "[MeSH Terms] AND ("treatment outcome"[MeSH Terms] OR treatment outcome[Text Word]) OR disseminated nocardiosis OR disseminated nocardia

**Google scholar = 170**

((CNS nocardiosis OR cerebral nocardiosis or intracranial nocardiosis)) AND ((meningitis OR brain abscess OR spinal abscess OR subdural abscess)) AND ((risk factors OR comorbidities)) AND ((treatment outcome OR mortality))

**Scopus = 222**

(TITLE-ABS-KEY ( cerebral AND nocardiosis ) )  OR  ( TITLE-ABS-KEY ( CNS AND nocardiosis ) )  AND  ( TITLE-ABS-KEY ( clinical AND manifestations ) )  OR  ( TITLE-ABS KEY ( brain AND abscess ) )  OR  ( TITLE-ABS-KEY ( meningitis ) )  AND  ( TITLE-ABS-KEY ( case AND report ) )  OR  ( TITLE-ABS-KEY ( case AND series ) )  OR  ( TITLE-ABS-KEY ( treatment  AND outcome ) )  OR  ( TITLE-ABS-KEY ( mortality ) )

**Supplementary File-2: References of all 129 articles included in Systematic review**

1. Anagnostou T, Arvanitis M, Kourkoumpetis TK, Desalermos A, Carneiro HA, Mylonakis E. Nocardiosis of the central nervous system: experience from a general hospital and review of 84 cases from the literature. Medicine (Baltimore). 2014 Jan;93(1):19-32.
2. Rafiei N, Peri AM, Righi E, Harris P, Paterson DL. Central nervous system nocardiosis in Queensland: A report of 20 cases and review of the literature. Medicine (Baltimore). 2016 Nov;95(46):e5255.
3. Su BA, Ko WC, Chuang YC, Tang HJ. Disseminated nocardiosis with thyroid involvement: a case report. J Microbiol Immunol Infect. 2011 Jun;44(3):238-40.
4. Shirani K, Mohajeri F. Nocardia farcinica isolated meningitis in a patient with Behçet's disease: case report and literature review. Rev Esp Quimioter. 2019 Aug;32(4):381-383.
5. Kranick SM, Zerbe CS. Case report from the NIH Clinical Center: CNS nocardiosis. J Neurovirol. 2013 Oct;19(5):505-7.
6. Nasri E, Fakhim H, Barac A, Yousefi S, Aghazade K, Boljevic D, Mardani M. Nocardia farcinica meningitis in a patient with high-grade astrocytoma. J Infect Dev Ctries. 2019 Sep 30;13(9):854-857.
7. Uneda A, Suzuki K, Okubo S, Hirashita K, Yunoki M, Yoshino K. Brain abscess caused by Nocardia asiatica. Surg Neurol Int. 2016 Jul 18;7:74.
8. Mete B, Yemisen M, Demirel AE, Ozaras R, Mert A, Ozturk R, Tabak F. A case of nocardiasis complicated with meningitis in a patient with immune thrombocytopenic purpura. Blood Coagul Fibrinolysis. 2010 Mar;21(2):185-7.
9. Chow FC, Marson A, Liu C. Successful medical management of a Nocardia farcinica multiloculated pontine abscess. BMJ Case Rep. 2013 Dec 5;2013:bcr2013201308.
10. Patel H, Patel B, Jadeja S, Isache C. Central nervous system nocardiosis masquerading as metastatic brain lesions. IDCases. 2019 Oct 1;18:e00652.
11. Tamarit M, Poveda P, Barón M, Del Pozo JM. Four cases of nocardial brain abscess. Surg Neurol Int. 2012;3:88.
12. Moniuszko-Malinowska A, Czupryna P, Swiecicka I, Grześ H, Siemieniako A, Grygorczuk S, Tarasów E, Pancewicz S. Nocardia farcinica as a cause of chronic meningitis - case report. BMC Infect Dis. 2020 Jan 17;20(1):56.
13. Galacho-Harriero A, Delgado-López PD, Ortega-Lafont MP, Martín-Alonso J, Castilla-Díez JM, Sánchez-Borge B. Nocardia farcinica Brain Abscess: Report of 3 Cases. World Neurosurg. 2017 Oct;106:1053.e15-1053.e24.
14. Galacho-Harriero A, Delgado-López PD, Ortega-Lafont MP, Martín-Alonso J, Castilla-Díez JM, Sánchez-Borge B. Nocardia farcinica Brain Abscess: Report of 3 Cases. World Neurosurg. 2017 Oct;106:1053.e15-1053.e24.
15. Matin A, Sharma S, Mathur P, Apewokin SK. Myelosuppression-sparing treatment of central nervous system nocardiosis in a multiple myeloma patient utilizing a tedizolid-based regimen: a case report. Int J Antimicrob Agents. 2017 Apr;49(4):488-492.
16. Chaudhari DM, Renjen PN, Sardana R, Butta H. *Nocardia Farcinica* Brain Abscess in an Immunocompetent Old Patient: A Case Report and Review of Literature. Ann Indian Acad Neurol. 2017 Oct-Dec;20(4):399-402.
17. Solano-Varela DM, Barrios-Vidales EM, Plaza DF, Riveros WM, Guzmán J, Chica CE, Patarroyo MA. Immunocompetent patient with a brain abscess caused by Nocardia beijingensis in Latin America: A case report. Medicine (Baltimore). 2019 Mar;98(11):e14879.
18. Cooper CJ, Said S, Popp M, Alkhateeb H, Rodriguez C, Porres Aguilar M, Alozie O. A complicated case of an immunocompetent patient with disseminated nocardiosis. Infect Dis Rep. 2014 Apr 4;6(1):5327.
19. Kumar VA, Augustine D, Panikar D, Nandakumar A, Dinesh KR, Karim S, Philip R. Nocardia farcinica brain abscess: epidemiology, pathophysiology, and literature review. Surg Infect (Larchmt). 2014 Oct;15(5):640-6.
20. Monticelli J, Luzzati R, Maurel C, Rosin C, Valentinotti R, Farina C. Brain Abscesses Caused by Nocardia paucivorans in a Multiple Myeloma Patient Treated with Lenalidomide and Dexamethasone: a Case Report and Review of Literature. Mediterr J Hematol Infect Dis. 2015 Jan 1;7(1):e2015011.
21. Aljuboori Z, Sharma M, Altstadt T. Diffuse Nocardial Spinal Subdural Empyema: Diagnostic Dilemma and Treatment Options. Cureus. 2017 Oct 24;9(10):e1795.
22. Tang H, Mao T, Gong Y, Mao Y, Xie Q, Wang D, Zhu H, Chen X, Zhou L. Nocardial brain abscess in an immunocompromised old patient: a case report and review of literature. Int J Clin Exp Med. 2014 May 15;7(5):1480-2.
23. Joshua S, Babu R, Warrier A, Panikar D. *Nocardia araoensis* Causing Brain Abscess. Asian J Neurosurg. 2019 Jul-Sep;14(3):952-956.
24. Tajima K, Terada T, Okuyama S, Akaneya D, Hori R, Abe S, Osakabe M, Kumagai H, Tsumanuma R, Omoto E, Ito J, Gonoi T. *Nocardia otitidiscaviarum*meningitis in a diffuse large B-cell lymphoma patient with CD4-positive lymphocytopenia and persistent oligoclonal CD8-positive lymphocytes in the peripheral blood. Int J Clin Exp Pathol. 2018 Jan 1;11(1):455-461.
25. Nalini A, Saini J, Mahadevan A. Central nervous system nocardiosis with granulomatous pachymeningitis and osteomyelitis of skull vault. Indian J Pathol Microbiol. 2014 Apr-Jun;57(2):332-4.
26. Stefaniak J. HIV/AIDS presenting with stroke-like features caused by cerebral Nocardia abscesses: a case report. BMC Neurol. 2015 Oct 7;15:183.
27. Aliaga L, Fatoul G, Guirao E, Peña A, Rodríguez-Granger J, Cobo F. *Nocardia paucivorans* brain abscess. Clinical and microbiological characteristics. IDCases. 2018 Jul 4;13:e00422.
28. Zayet S, Lang S, Ben Abdallah Y, Klopfenstein T, Gendrin V. Asymptomatic cerebral abscesses after pleuropulmonary *Nocardia farcinica* infection. New Microbes New Infect. 2020 Nov 7;38:100808.
29. Lai RH, Kim D, Constantinescu F. A case of central nervous system nocardiosis in a patient with lupus treated with belimumab. Eur J Rheumatol. 2016 Dec;3(4):188-190.
30. Hammoud M, Kraft C, Pulst-Korenberg J, Chenoweth C, Gregg KS. Disseminated Nocardia paucivorans infection in an immunocompetent host. Infection. 2014 Oct;42(5):917-20.
31. Pascual-Gallego M, Alonso-Lera P, Arribi A, Barcia JA, Marco J. *Nocardia farcinica* abscess of the cerebellum in an immunocompetent patient: A case report and review of the literature. Asian J Neurosurg. 2016 Oct-Dec;11(4):454.
32. Chakraborty T, Vyas M, Goyal A, Madan VS. A rare case of isolated cauda equina Nocardia farcinica infection. J Neurovirol. 2020 Aug;26(4):615-618.
33. Sharma M, Anthony C, Hsu CC-T, Maclean C, Maartens C. Disseminated cerebral and intradural extramedullary spinal nocardiosis in an immunocompetent patient. EJCRIM 2015;2 :doi: 10.12890/2015_000207
34. Chansirikarnjana S, Apisarnthanarak A, Suwantarat N, Damronglerd P, Rutjanawech S, Visuttichaikit S, Khawcharoenporn T. Nocardia intracranial mycotic aneurysm associated with proteasome inhibitor. IDCases. 2019 Jul 18;18:e00601.
35. Smith LM, Galvin SR (2015) *Nocardia puris* brain abscess in an immunocompromised woman. JMM Case Rep. <https://doi.org/10.1099/jmmcr.0.000020>
36. Green JS, Abeles SR, Uslan DZ, Mehta SR. Persistent neutrophilic meningitis in an immunocompetent patient after basilar skull fracture: case report. BMC Infect Dis. 2011 May 19;11:136.
37. Wang T, Jia Y, Chu B, Liu H, Dong X, Zhang Y. Nocardiosis in Kidney Disease Patients under Immunosuppressive Therapy: Case Report and Literature Review. Int J Med Sci. 2019 Jun 2;16(6):838-844.
38. Terebelo S, Sharif S, Chaudhry ZA, Ginzler E. Disseminated nocardiosis in an immunosuppressed patient with systemic lupus erythematosus and neuromyelitis optica spectrum disorder. Lupus. 2020 Dec 1:961203320976928.
39. Livings C, Uemura M, Patel R, Afshar M. *Nocardia farcinica* masquerading as intracerebral metastases in advanced metastatic prostatic cancer. BMJ Case Rep. 2020 Sep 7;13(9):e233678.
40. Liverotti V, Dobran M, Nasi D, Di Rienzo A. A rare case of nocardial pachymeningitis and osteomyelitis of frontal bone in an immunocompetent young patient. Indian J Pathol Microbiol. 2019 Jul-Sep;62(3):483-485.
41. Grond SE, Schaller A, Kalinowski A, Tyler KA, Jha P. Nocardia farcinica Brain Abscess in an Immunocompetent Host With Pulmonary Alveolar Proteinosis: A Case Report and Review of the Literature. Cureus. 2020 Nov 15;12(11):e11494.
42. Shihara M, Takada D, Sugimoto K, Oguro H, Gonoi T, Akiyama Y, Yamaguchi S. Primary brain abscess caused by Nocardia otitidiscaviarum. Intern Med. 2014;53(17):2007-12.
43. D M Radhakrishnan, V Goyal, G Shukla, Nocardia: a rare cause of brain abscess, *QJM: An International Journal of Medicine*, Volume 111, Issue 8, August 2018, Pages 561–562,
44. Zhu JW, Zhou H, Jia WQ, You J, Xu RX. A clinical case report of brain abscess caused by Nocardia brasiliensis in a non-immunocompromised patient and a relevant literature review. BMC Infect Dis. 2020 May 7;20(1):328.
45. Kim S, Lee KL, Lee DM, Jeong JH, Moon SM, Seo YH, Yoo CJ, Yang D, Cho YK, Park YS. Nocardia brain abscess in an immunocompetent patient. Infect Chemother. 2014 Mar;46(1):45-9. doi: 10.3947/ic.2014.46.1.45. Epub 2014 Mar 21. Erratum in: Infect Chemother. 2015 Dec;47(4):304.
46. Zhang, Y., Zhu, W., li, Q. *et al.* Nocardial brain abscess in an immunocompetent patient and review of literature. *Chin Neurosurg Jl* **2,**26 (2016). https://doi.org/10.1186/s41016-016-0043-6
47. Stokes MB, Reardon KA, O'Day J. Acute spinal cord compression caused by disseminated Nocardia infection involving the conus medullaris. Clin Neurol Neurosurg. 2010 Oct;112(8):726-8.
48. Yamamoto F, Yamashita S, Kawano H, Tanigawa T, Mihara Y, Gonoi T, Ando Y. Meningitis and Ventriculitis due to Nocardia araoensis Infection. Intern Med. 2017;56(7):853-859.
49. Penkert H, Delbridge C, Wantia N, Wiestler B, Korn T. Fulminant Central Nervous System Nocardiosis in a Patient Treated With Alemtuzumab for Relapsing-Remitting Multiple Sclerosis. JAMA Neurol. 2016 Jun 1;73(6):757-9.
50. Kobayashi N, Sueoka-Aragane N, Naganobu N, Umeguchi H, Kusaba K, Nagasawa Z, Yazawa K, Gonoi T, Kimura S, Hayashi S. Disseminated Nocardiosis caused by Nocardia concava with acute respiratory failure and central nervous system involvement treated with linezolid. Intern Med. 2012;51(23):3281-5.
51. Boamah H, Puranam P, Sandre RM. Disseminated Nocardia farcinica in an immunocompetent patient. IDCases. 2016 Aug 12;6:9-12.
52. Malek, A.E., Viola, G.M., Seiler, G.T. *et al.* Disseminated *Nocardia farcinica* infection in immunocompromised patient. *Infection* **48,**487–488 (2020).
53. Kilincer C, Hamamcioglu MK, Simsek O, Hicdonmez T, Aydoslu B, Tansel O, Tiryaki M, Soy M, Tatman-Otkun M, Cobanoglu S. Nocardial brain abscess: review of clinical management. J Clin Neurosci. 2006 May;13(4):481-5.
54. Dias M, Nagarathna S, Mahadevan A, Chandramouli BA, Chandramuki A. Nocardial brain abscess in an immunocompetent host. Indian J Med Microbiol. 2008 Jul-Sep;26(3):274-7.
55. Moylett EH, Pacheco SE, Brown-Elliott BA, Perry TR, Buescher ES, Birmingham MC, Schentag JJ, Gimbel JF, Apodaca A, Schwartz MA, Rakita RM, Wallace RJ Jr. Clinical experience with linezolid for the treatment of nocardia infection. Clin Infect Dis. 2003 Feb 1;36(3):313-8.
56. Al-Tawfiq JA, Al-Khatti AA. Disseminated systemic Nocardia farcinica infection complicating alefacept and infliximab therapy in a patient with severe psoriasis. Int J Infect Dis. 2010 Feb;14(2):e153-7.
57. Ozen Y, Dokuzogus B, Mumcuoglu I, Celikbas AK, Karahan ZC, Ozbay BO. Disseminated Nocardia farcinica infection presenting as a paravertebral abscess in a patient with systemic lupus erythematosus. Indian J Pathol Microbiol 2019;62:329-31.
58. Zakaria A, Elwatidy S, Elgamal E. Nocardia brain abscess: severe CNS infection that needs aggressive management; case report. Acta Neurochir (Wien). 2008 Oct;150(10):1097-101; discussion 1101.
59. Al Soub H, Almaslamani M, Al Khuwaiter J, El Deeb Y, Khatab MA. Primary Nocardia meningitis in a patient without a predisposing condition: case report and review of the literature. Scand J Infect Dis. 2007;39(8):737-41.
60. Sonesson A, Oqvist B, Hagstam P, Björkman-Burtscher IM, Miörner H, Petersson AC. An immunosuppressed patient with systemic vasculitis suffering from cerebral abscesses due to Nocardia farcinica identified by 16S rRNA gene universal PCR. Nephrol Dial Transplant. 2004 Nov;19(11):2896-900.
61. Yorke RF, Rouah E. Nocardiosis with brain abscess due to an unusual species, Nocardia transvalensis. Arch Pathol Lab Med. 2003 Feb;127(2):224-6.
62. Fellows GA, Kalsi PS, Martin AJ. Nocardia farcinica brain abscess in a patient without immunocompromise. Br J Neurosurg. 2007 Jun;21(3):301-3.
63. Warnatz K, Peter HH, Schumacher M, Wiese L, Prasse A, Petschner F, Vaith P, Volk B, Weiner SM. Infectious CNS disease as a differential diagnosis in systemic rheumatic diseases: three case reports and a review of the literature. Ann Rheum Dis. 2003 Jan;62(1):50-7.
64. Rupprecht TA, Pfister HW. Clinical experience with linezolid for the treatment of central nervous system infections. Eur J Neurol. 2005 Jul;12(7):536-42.
65. Malincarne L, Marroni M, Farina C, Camanni G, Valente M, Belfiori B, Fiorucci S, Floridi P, Cardaccia A, Stagni G. Primary brain abscess with Nocardia farcinica in an immunocompetent patient. Clin Neurol Neurosurg. 2002 May;104(2):132-5.
66. Kennedy KJ, Chung KH, Bowden FJ, Mews PJ, Pik JH, Fuller JW, Chandran KN. A cluster of nocardial brain abscesses. Surg Neurol. 2007 Jul;68(1):43-9; discussion 49.
67. Justiniano M, Glorioso S, Dold S, Espinoza LR. Nocardia brain abscesses in a male patient with SLE: successful outcome despite delay in diagnosis. Clin Rheumatol. 2007 Jun;26(6):1020-2.
68. Atalay B, Azap O, Cekinmez M, Caner H, Haberal M. Nocardial epidural abscess of the thoracic spinal cord and review of the literature. J Infect Chemother. 2005 Jun;11(3):169-71
69. Soto-Hernández JL, Moreno-Andrade T, Góngora-Rivera F, Ramírez-Crescencio MA. Nocardia abscess during treatment of brain toxoplasmosis in a patient with aids, utility of proton MR spectroscopy and diffusion-weighted imaging in diagnosis. Clin Neurol Neurosurg. 2006 Jul;108(5):493-8.
70. Freiberg JA, Saharia KK, Morales MK. An unusual case of Nocardia cyriacigeorgica presenting with spinal abscesses in a renal transplant recipient and a review of the literature. Transpl Infect Dis. 2019 Feb;21(1):e13025.
71. Ma F, Kang M, Liao YH, Lee GZ, Tang Q, Tang C, Ding YH, Zhong J. Nocardial spinal epidural abscess with lumbar disc herniation: A case report and review of literature. Medicine (Baltimore). 2018 Dec;97(49):e13541.
72. Hemmersbach-Miller M, Martel AC, Benítez AB, Sosa AO. Brain abscess due to Nocardia otitidiscaviarum: report of a case and review. Scand J Infect Dis. 2004;36(5):381-4.
73. Montoya JP, Carpenter JL, Holmes GP, Hurley DL, Winn R. Disseminated Nocardia transvalensis infection with osteomyelitis and multiple brain abscesses. Scand J Infect Dis. 2003;35(3):189-96.
74. Fihman V, Berçot B, Mateo J, Losser MR, Raskine L, Riahi J, Loirat P, Pors MJ. First successful treatment of Nocardia farcinica brain abscess with moxifloxacin. J Infect. 2006 Apr;52(4):e99-102.
75. Corti, Marcelo MD, Villafañe, María F. MD, Yampolsky, Claudio MD, et al. Nocardial Brain Abscess Due to Nocardia asteroides Sensu Estricto Type VI Successfully Treated With Antibiotics Alone in an AIDS Patient, Infectious Diseases in Clinical Practice: September 2008 - Volume 16 - Issue 5 - p 338-341.
76. Oshiro S, Ohnishi H, Ohta M, Tsuchimochi H. Intraventricular rupture of Nocardia brain abscess--case report. Neurol Med Chir (Tokyo). 2003 Jul;43(7):360-3.
77. Yasuda N, Ohmori S, Usui T. A case of Evans' syndrome complicated with multiple nocardial abscesses: a long-term survivor under corticosteroid therapy. Int J Hematol. 2001 Aug;74(2):233-4.
78. Pamuk GE, Pamuk ON, Tabak F, Mert A, Oztürk R, Aktuğlu Y. Systemic Nocardia infection in a patient with Behçet's disease. Rheumatology (Oxford). 2001 May;40(5):597-9.
79. Héron E, Augustin P, Cervera P, Girmens JF, Généreau T, Lortholary O, Cabane J. Systemic nocardiosis mimicking an ocular relapse of giant-cell arteritis. Rheumatology (Oxford). 2006 May;45(5):641-3.
80. Wendling D, Murad M, Mathieu S, Berger E, Rumbach L. Systemic nocardiosis in a case of rheumatoid arthritis treated with tumor necrosis factor blockers. J Rheumatol. 2008 Mar;35(3):539-42.
81. Durán E, López L, Martínez A, Comuñas F, Boiron P, Rubio MC. Primary brain abscess with Nocardia otitidiscaviarum in an intravenous drug abuser. J Med Microbiol. 2001 Jan;50(1):101-3.
82. Menkü A, Kurtsoy A, Tucer B, Yildiz O, Akdemir H. Nocardia brain abscess mimicking brain tumour in immunocompetent patients: report of two cases and review of the literature. Acta Neurochir (Wien). 2004 Apr;146(4):411-4; discussion 414.
83. Sabuncuoğlu H, Cibali Açikgo Z Z, Caydere M, Ustün H, Semih Keskil I. Nocardia farcinica brain abscess: a case report and review of the literature. Neurocirugia (Astur). 2004 Dec;15(6):600-3.
84. Hagiwara E, Nath J. Choroid plexitis in a case of systemic nocardiosis. Emerg Radiol. 2007 Oct;14(5):337-43.
85. Oztürk S, Tufan F, Alişir S, Görçin S, Güven D, Cağatay A, Türkmen A. A case of isolated Nocardia asteroides brain abscess in a kidney transplant recipient. Transplant Proc. 2006 Nov;38(9):3121-4.
86. Dehghani M, Davarpanah MA. Epididymo-orchitis and central nervous system nocardiosis in a bone marrow transplant recipient for acute lymphoblastic leukemia. Exp Clin Transplant. 2009 Dec;7(4):264-6. Erratum in: Exp Clin Transplant. 2010 Jun;8(2):189.
87. Tachezy M, Simon P, Ilchmann C, Vashist YK, Izbicki JR, Gawad KA. Abscess of adrenal gland caused by disseminated subacute Nocardia farcinica pneumonia. A case report and mini-review of the literature. BMC Infect Dis. 2009 Dec 2;9:194.
88. Barnaud G, Deschamps C, Manceron V, Mortier E, Laurent F, Bert F, Boiron P, Vinceneux P, Branger C. Brain abscess caused by Nocardia cyriacigeorgica in a patient with human immunodeficiency virus infection. J Clin Microbiol. 2005 Sep;43(9):4895-7.
89. Chedid MB, Chedid MF, Porto NS, Severo CB, Severo LC. Nocardial infections: report of 22 cases. Rev Inst Med Trop Sao Paulo. 2007 Jul-Aug;49(4):239-46.
90. Valarezo J, Cohen JE, Valarezo L, Spektor S, Shoshan Y, Rosenthal G, Umansky F. Nocardial cerebral abscess: report of three cases and review of the current neurosurgical management. Neurol Res. 2003 Jan;25(1):27-30.
91. Shivaprakash MR, Rao P, Mandal J, Biswal M, Gupta S, Ray P, Chakrabarti A. Nocardiosis in a tertiary care hospital in North India and review of patients reported from India. Mycopathologia. 2007 May;163(5):267-74.
92. Mascarenhas NB, Lam D, Lynch GR, Fisher RE. PET imaging of cerebral and pulmonary Nocardia infection. Clin Nucl Med. 2006 Mar;31(3):131-3.
93. Ono M, Kobayashi Y, Shibata T, Maruyama D, Kim SW, Watanabe T, Mikami Y, Tobinai K. Nocardia exalbida brain abscess in a patient with follicular lymphoma. Int J Hematol. 2008 Jul;88(1):95-100.
94. Elmaci I, Senday D, Silav G, Ekenel F, Balak N, Ayan E, Akinci M, Isik N, Yazici S. Nocardial cerebral abscess associated with mycetoma, pneumonia, and membranoproliferative glomerulonephritis. J Clin Microbiol. 2007 Jun;45(6):2072-4.
95. Hashimoto M, Johkura K, Ichikawa T, Shinonaga M. Brain abscess caused by Nocardia nova. J Clin Neurosci. 2008 Jan;15(1):87-9.
96. Iannotti CA, Hall GS, Procop GW, Tuohy MJ, Staugaitis SM, Weil RJ. Solitary Nocardia farcinica brain abscess in an immunocompetent adult mimicking metastatic brain tumor: rapid diagnosis by pyrosequencing and successful treatment. Surg Neurol. 2009 Jul;72(1):74-9; discussion 79.
97. Shin JH, Lee HK. Nocardial brain abscess in a renal transplant recipient. Clin Imaging. 2003 Sep-Oct;27(5):321-4.
98. Weerakkody RM, Palangasinghe DR, Wadanambi S, Wijewikrama ES. "Primary" nocardial brain abscess in a renal transplant patient. BMC Res Notes. 2015 Nov 23;8:701.
99. Charfeddine K, Kharrat M, Yaich S, Abdelmalek R, Hakim H, Bahloul H, Jarraya F, Hammami A, Hachicha J. Systemic nocardiosis with multiple brain abscesses in a renal transplant recipient: successfully treated with antibiotics alone. Saudi J Kidney Dis Transpl. 2002 October-December;13(4):498-500.
100. Wakhlu A, Agarwal V, Dabadghao S, Prasad KN, Nityanand S. Nocardiosis in patients of chronic idiopathic thrombocytopenic purpura on steroids. J Assoc Physicians India. 2004 Jul;52:591-3.
101. Börm W, Gleixner M. Nocardia brain abscess misinterpreted as cerebral infarction. J Clin Neurosci. 2003 Jan;10(1):130-2.
102. Yaakup NA, Rahmat K, Ramli N, Sia SF (2009) Cerebral nocardiosis in an immunocompetent patient: A diagnostic dilemma. *European Journal of Radiology Extra* **71**:e47–e51.
103. Biglarnia AR, Wadström J, Tufveson G, Eriksson BM. Pulmonary nocardiosis with brain abscess in a sensitized kidney transplant recipient with a history of repeated graft loss and HLA-antibody depletion treatment--a case report. Ups J Med Sci. 2008;113(1):111-6.
104. Lim HK, Tseng HK, Liu CP, Lee CM. Primary brain abscess due to *Nocardia otitidiscaviarum*: a case report. J Intern Med Taiwan 16: 279-282, 2005.
105. Sud S, Buxi T, Anand I, Rohatgi A. Case series: Nocardiosis of the brain and lungs. Indian J Radiol Imaging. 2008 Aug;18(3):218-21. doi: 10.4103/0971-3026.41830. PMID: 19774160; PMCID: PMC2747439.
106. Diego C, Ambrosioni JC, Abel G, Fernando B, Tomás O, Ricardo N, Jorge B. Disseminated nocardiosis caused by Nocardia abscessus in an HIV-infected patient: first reported case. AIDS. 2005 Aug 12;19(12):1330-1.
107. Lopez FA, Johnson F, Novosad DM, Beaman BL, Holodniy M. Successful management of disseminated Nocardia transvalensis infection in a heart transplant recipient after development of sulfonamide resistance: case report and review. J Heart Lung Transplant. 2003 Apr;22(4):492-7.
108. Alp E, Yildiz O, Aygen B, Sumerkan B, Sari I, Koc K, Couble A, Laurent F, Boiron P, Doganay M. Disseminated nocardiosis due to unusual species: two case reports. Scand J Infect Dis. 2006;38(6-7):545-8.
109. Elsayed S, Kealey A, Coffin CS, Read R, Megran D, Zhang K. Nocardia cyriacigeorgica septicemia. J Clin Microbiol. 2006 Jan;44(1):280-2.
110. Lakshmi V, Sundaram C, Meena AK, Murthy JM. Primary cutaneous nocardiosis with epidural abscess caused by Nocardia brasiliensis: a case report. Neurol India. 2002 Mar;50(1):90-2.
111. Hartmann A, Halvorsen CE, Jenssen T, Bjørneklett A, Brekke IB, Bakke SJ, Hirschberg H, Tønjum T, Gaustad P. Intracerebral abscess caused by Nocardia otitidiscaviarum in a renal transplant patient--cured by evacuation plus antibiotic therapy. Nephron. 2000 Sep;86(1):79-83.
112. Fleetwood IG, Embil JM, Ross IB. Nocardia asteroides cerebral abscess in immunocompetent hosts: report of three cases and review of surgical recommendations. Surg Neurol. 2000 Jun;53(6):605-10.
113. Torres OH, Domingo P, Pericas R, Boiron P, Montiel JA, Vázquez G. Infection caused by Nocardia farcinica: case report and review. Eur J Clin Microbiol Infect Dis. 2000 Mar;19(3):205-12.
114. Srinivas KV, Freigoun OS, Rabie A, Want MA, Bhakthavatsalam, Udayashanker. Cerebral Nocardiosis in a Renal Transplant Recipient: A Case report. Saudi J kidney Dis Transpl. 2000;11:583-6.
115. Martín FJ, Pérez-Bernal AM, Camacho F. Pemphigus vulgaris and disseminated nocardiosis. J Eur Acad Dermatol Venereol. 2000 Sep;14(5):416-8.
116. Eisenblätter M, Disko U, Stoltenburg-Didinger G, Scherübl H, Schaal KP, Roth A, Ignatius R, Zeitz M, Hahn H, Wagner J. Isolation of Nocardia paucivorans from the cerebrospinal fluid of a patient with relapse of cerebral nocardiosis. J Clin Microbiol. 2002 Sep;40(9):3532-4.
117. Young WF. Syringomyelia presenting as a delayed complication of treatment for nocardia brain abscess. Spinal Cord. 2000 Apr;38(4):265-9.
118. Kandasamy J, Iqbal HJ, Cooke RP, Eldridge PR. Primary Nocardia farcinica brain abscess with secondary meningitis and ventriculitis in an immunocompetent patient, successfully treated with moxifloxacin. Acta Neurochir (Wien). 2008 May;150(5):505-6.
119. Iwazu K, Iwazu Y, Takeda S, Akimoto T, Yumura W, Takahashi H, Ito C, Kanai K, Taniguchi N, Hirai Y, Kusano E. Successful treatment of serial opportunistic infections including disseminated nocardiosis and cryptococcal meningitis in a patient with ANCA-associated vasculitis. Intern Med. 2012;51(21):3051-6.
120. Tilak R, Achra A, Tilak V. Primary cerebral nocardiosis in a renal transplant recipient: a case report. J Clin Diagn Res. 2012 Oct;6(8):1417-8. doi: 10.7860/JCDR/2012/4127.2374. PMID: 23205362; PMCID: PMC3471488.
121. Alijani N, Mahmoudzadeh S, Hedayat Yaghoobi M, Gerami shoar M, Jafari S. Multiple brain abscesses due to Nocardia in an immunocompetent patient. Arch Iran Med. 2013; 16(3): 192 – 194.
122. Farran Y, Antony S. Nocardia abscessus-related intracranial aneurysm of the internal carotid artery with associated brain abscess: A case report and review of the literature. J Infect Public Health. 2016 May-Jun;9(3):358-61.
123. Flateau C, Jurado V, Lemaître N, Loïez C, Wallet F, Saiz-Jimenez C, Decoene C, Bergeron E, Boiron P, Faure K, Guery B, Rodríguez-Nava V. First case of cerebral abscess due to a novel Nocardia species in an immunocompromised patient. J Clin Microbiol. 2013 Feb;51(2):696-700.
124. Tachezy, M., Simon, P., Ilchmann, C. *et al.* Abscess of adrenal gland caused by disseminated subacute Nocardia farcinica pneumonia. A case report and mini-review of the literature. *BMC Infect Dis* 9, 194 (2009).
125. Bhargava A, Kombade S, Dash D, Jain Y. Disseminated nocardiasis by *Nocardia farcinica*: Review and first case report from Central India. Med J Armed Forces India. 2019 Jan;75(1):106-111.
126. Weber L, Yium J, Hawkins S. Intracranial Nocardia dissemination during minocycline therapy. Transpl Infect Dis. 2002 Jun;4(2):108-12.
127. Peleg AY, Husain S, Qureshi ZA, Silveira FP, Sarumi M, Shutt KA, Kwak EJ, Paterson DL. Risk factors, clinical characteristics, and outcome of Nocardia infection in organ transplant recipients: a matched case-control study. Clin Infect Dis. 2007 May 15;44(10):1307-14.
128. Lafont E, Marciano BE, Mahlaoui N, Neven B, Bustamante J, Rodriguez-Nava V, et al. Nocardiosis Associated with Primary Immunodeficiencies (Nocar-DIP): an International Retrospective Study and Literature Review. J Clin Immunol. 2020 Nov;40(8):1144-1155.
129. Coussement J, Lebeaux D, van Delden C, Guillot H, Freund R, Marbus S, et al; European Study Group for Nocardia in Solid Organ Transplantation. Nocardia Infection in Solid Organ Transplant Recipients: A Multicenter European Case-control Study. Clin Infect Dis. 2016 Aug 1;63(3):338-45.
